# Supplementary material for: Shared and Unique Proteins in Human, Mouse and Rat Saliva Proteomes: Footprints of Functional Adaptation
Source: Proteomes. 2013 Dec 16;1(3):275–89. doi: 10.3390/proteomes1030275 (PMC4051352; doi:10.3390/proteomes1030275)
Supplement: Supplementary File 1 [file proteomes-01-00275-s001.xlsx]

## Sheet: SF1
UniProt	UniProtName	SignalP	Orthologous/paralogous gene expressed in rodents saliva
P01857	IGHG1	no
P01871	IGHM	no
P01876	IGHA1	no
P04075	ALDOA	no
P04080	CYTB	no
P04083	ANXA1	no
P04406	G3P	no
P05109	S10A8	no
P06702	S10A9	no
P06733	ENOA	no
P09211	GSTP1	no
P10599	THIO	no
P13796	PLSL	no
P14618	KPYM	no
P23284	PPIB	no
P29508	SPB3	no
P30086	PEBP1	no
P30740	ILEU	no
P31151	S10A7	no
P31947	1433S	no
P37802	TAGL2	no
P60709	ACTB	no
P62937	PPIA	no
P68871	HBB	no
P69905	HBA	no	y
Q01469	FABP5	no
Q8NBJ4	GOLM1	no
Q96DA0	ZG16B	no
Q9UBC9	SPRR3	no
Q9UBX7	KLK11	no
A8K2U0	A2ML1	YES	y
P01034	CYTC	YES	y
P01036	CYTS	YES	y
P01037	CYTN	YES	y
P01833	PIGR	YES	y
P02768	ALBU	YES	y
P02787	TRFE	YES	y
P02810	PRPC	YES	y
P04280	PRP1	YES	y
P04745	AMY1	YES	y
P06870	KLK1	YES	y
P09228	CYTT	YES	y
P10163	PRB4	YES	y
P12273	PIP	YES	y
P22079	LPO	YES	y
P23280	CAH6	YES	y
P28325	CYTD	YES	y
P31025	LCN1	YES	y
P80303	NUCB2	YES	y
Q14508	WFDC2	YES	y
Q6P5S2	CF058	YES	y
Q8TDL5	BPIB1	YES	y
Q96DR5	BPIA2	YES	y
P00450	CERU	YES
P00738	HPT	YES
P01009	A1AT	YES
P01033	TIMP1	YES
P01591	IGJ	YES
P02647	APOA1	YES
P02675	FIBB	YES
P02679	FIBG	YES
P02749	APOH	YES
P02750	A2GL	YES
P02766	TTHY	YES
P02774	VTDB	YES
P02788	TRFL	YES
P02808	STAT	YES
P02814	SMR3B	YES
P07237	PDIA1	YES
P07339	CATD	YES
P07602	SAP	YES
P15515	HIS1	YES
P16870	CBPE	YES
P20061	TCO1	YES
P25311	ZA2G	YES
P32926	DSG3	YES
P61626	LYSC	YES
P80188	NGAL	YES
Q02487	DSC2	YES
Q02818	NUCB1	YES
Q08380	LG3BP	YES
Q14515	SPRL1	YES
Q6MZM9	CD040	YES
Q6PJF2	Q6PJF2	YES
Q7Z3Y4	Q7Z3Y4	YES
Q8N4F0	BPIB2	YES
Q9NQ38	ISK5	YES
Q9UGM3	DMBT1	YES
Q9Y6R7	FCGBP	YES

## Sheet: SF2
UniProt	UniProtName	Orthologous/paralogous gene expressed in rodents saliva
A0A5E4	A0A5E4
A6NJS3	IV1U1
D3DQX7	D3DQX7
O00115	DNS2A
O00391	QSOX1
O00462	MANBA
O00584	RNT2
O00592	PODXL
O00748	EST2
O00754	MA2B1	y
O14672	ADA10
O14773	TPP1
O15335	CHAD
O43278	SPIT1
O43291	SPIT2
O43490	PROM1
O60245	PCDH7
O75594	PGRP1
O75629	CREG1
O75787	RENR
O75976	CBPD
O94985	CSTN1
O95084	PRS23
O95274	LYPD3
O95450	ATS2
O95841	ANGL1
O95973	O95973
P00734	THRB
P00740	FA9
P00747	PLMN
P00748	FA12
P01008	ANT3
P01011	AACT
P01019	ANGT	y
P01023	A2MG	y
P01042	KNG1
P01133	EGF	y
P01743	HV102
P02452	CO1A1
P02649	APOE
P02652	APOA2
P02671	FIBA
P02743	SAMP
P02751	FINC
P02753	RET4
P02763	A1AG1
P02790	HEMO
P03915	NU5M
P03950	ANGI
P03952	KLKB1
P03973	SLPI
P03989	1B27
P04004	VTNC
P04196	HRG
P04207	KV308
P04211	LV001
P04217	A1BG
P04433	KV309
P04746	AMYP	y
P05067	A4
P05090	APOD
P05155	IC1
P05164	PERM
P06310	KV206
P06311	KV311
P06314	KV404
P06319	LV605
P06331	HV209
P06396	GELS
P06727	APOA4
P06731	CEAM5
P06865	HEXA
P07093	GDN
P07477	TRY1	y
P07711	CATL1
P07858	CATB
P07996	TSP1
P07998	RNAS1	y
P08123	CO1A2
P08174	DAF
P08185	CBG
P08246	ELNE
P08294	SODE
P08311	CATG
P08476	INHBA
P08493	MGP
P08571	CD14
P08575	PTPRC
P08582	TRFM
P08603	CFAH
P09237	MMP7
P09486	SPRC
P09668	CATH
P09958	FURIN
P0C0L4	CO4A
P0DJI8	SAA1
P10153	RNAS2
P10586	PTPRF
P10619	PPGB
P10909	CLUS
P11021	GRP78
P11678	PERE
P11684	UTER
P12109	CO6A1
P12110	CO6A2
P12111	CO6A3
P12830	CADH1
P13667	PDIA4
P13688	CEAM1
P13746	1A11
P13987	CD59
P14314	GLU2B
P14625	ENPL
P14780	MMP9
P15328	FOLR1
P15516	HIS3
P16070	CD44
P16233	LIPP
P16444	DPEP1
P17900	SAP3
P18135	KV312
P18136	KV313
P18510	IL1RA
P19021	AMD
P19652	A1AG2
P19823	ITIH2
P19827	ITIH1
P19957	ELAF
P19961	AMY2B
P20062	TCO2	y
P20151	KLK2
P20160	CAP7
P20742	PZP
P20827	EFNA1
P20933	ASPG
P21128	ENDOU
P21246	PTN
P21741	MK
P21810	PGS1
P22894	MMP8
P23083	HV103
P24158	PRTN3
P24592	IBP6
P25774	CATS
P27797	CALR
P27918	PROP
P28799	GRN	y
P29622	KAIN
P30101	PDIA3
P31997	CEAM8
P34096	RNAS4
P35318	ADML
P35442	TSP2
P35475	IDUA
P36955	PEDF
P39060	COIA1
P40189	IL6RB
P40199	CEAM6
P42785	PCP
P43652	AFAM
P45877	PPIC
P49257	LMAN1
P49788	TIG1
P49862	KLK7
P49908	SEPP1
P50897	PPT1
P51888	PRELP
P52823	STC1
P53634	CATC
P54802	ANAG
P55268	LAMB2
P55287	CAD11
P58062	ISK7
P59665	DEF1
P60022	DEFB1
P61769	B2MG
P81605	DCD
P98088	MUC5A
P98160	PGBM
Q00888	PSG4
Q01459	DIAC
Q02413	DSG1
Q02817	MUC2
Q04118	PRB3	y
Q06828	FMOD
Q07654	TFF3
Q08174	PCDH1
Q08345	DDR1
Q08554	DSC1
Q10471	GALT2
Q13162	PRDX4
Q13217	DNJC3
Q13232	NDK3
Q13332	PTPRS
Q13421	MSLN
Q13438	OS9
Q13510	ASAH1
Q14050	CO9A3
Q14118	DAG1
Q14242	SELPL
Q14574	DSC3
Q14624	ITIH4
Q14697	GANAB
Q14766	LTBP1
Q14802	FXYD3
Q15084	PDIA6
Q15293	RCN1
Q15517	CDSN
Q15582	BGH3
Q15782	CH3L2
Q16270	IBP7
Q16363	LAMA4
Q16378	PROL4
Q16586	SGCA
Q16610	ECM1
Q16651	PRSS8
Q16769	QPCT
Q24JP5	T132A
Q2I0M4	LRC26
Q5EFE5	Q5EFE5
Q5GFL6	VWA2
Q68D45	Q68D45
Q6MZQ6	Q6MZQ6
Q6MZU6	Q6MZU6
Q6MZV6	Q6MZV6
Q6MZW0	Q6MZW0
Q6MZX9	Q6MZX9
Q6N030	Q6N030
Q6N089	Q6N089
Q6N090	Q6N090
Q6N091	Q6N091
Q6N097	Q6N097
Q6NS95	Q6NS95
Q6P089	Q6P089
Q6P5S8	Q6P5S8
Q6PCB0	VWA1
Q6PIL0	Q6PIL0
Q6UVK1	CSPG4
Q6UWT4	CE046
Q6UX06	OLFM4
Q6UXB2	VCC1
Q6YHK3	CD109
Q6ZP85	Q6ZP85
Q6ZP87	Q6ZP87
Q6ZTQ4	CDHR3
Q6ZVX0	Q6ZVX0
Q6ZW64	Q6ZW64
Q7Z351	Q7Z351
Q7Z374	Q7Z374
Q86UD1	OAF
Q86VR7	VS10L
Q86YA1	Q86YA1
Q8IWU5	SULF2
Q8N474	SFRP1
Q8NCR0	B3GL2
Q8NES3	LFNG
Q8NFT8	DNER
Q8NFU4	FDSCP
Q8NI22	MCFD2
Q8TAX7	MUC7
Q8WWA0	ITLN1
Q8WXG9	GPR98
Q8WY24	Q8WY24
Q92485	ASM3B
Q92673	SORL
Q92743	HTRA1
Q92820	GGH	y
Q92876	KLK6
Q92896	GSLG1
Q96DK0	Q96DK0
Q96DR8	MUCL1
Q96HE7	ERO1A
Q96J42	TXD15
Q96K68	Q96K68
Q96P44	COLA1
Q96PD5	PGRP2
Q96QR1	SG3A1
Q96QS0	Q96QS0
Q96RW7	HMCN1
Q96S96	PEBP4
Q99523	SORT
Q99538	LGMN
Q99574	NEUS
Q99954	SMR3A	y
Q9BQR3	PRS27
Q9BRK5	CAB45
Q9BS26	ERP44
Q9BWS9	CHID1
Q9BXJ4	C1QT3
Q9GZM7	TINAL
Q9GZZ8	LACRT
Q9H173	SIL1
Q9H8J5	MANS1
Q9HAT2	SIAE
Q9HB40	RISC
Q9NP29	Q9NP29
Q9NP55	BPIA1
Q9NQX5	NPDC1
Q9NRA1	PDGFC
Q9NRJ3	CCL28
Q9NS68	TNR19
Q9NS98	SEM3G
Q9NYQ8	FAT2
Q9NZ08	ERAP1
Q9UBR2	CATZ
Q9UBS3	DNJB9
Q9UHL4	DPP2
Q9UI42	CBPA4
Q9UJJ9	GNPTG
Q9UKR0	KLK12
Q9UKR3	KLK13
Q9ULL4	PLXB3
Q9Y337	KLK5
Q9Y4L1	HYOU1
Q9Y646	CBPQ
Q9Y653	GPR56

## Sheet: SF3
protein description	UniProt	UniProtID	SignalP	paralog expressed in rodents?
Ig γ-2 chain C region	P01859	IGHG2_HUMAN	N
Ig γ-3 heavy chain	P01860	IGHG3_HUMAN	N
Ig γ-4 chain C region	P01861	IGHG4_HUMAN	N
Ig α-2 chain C region	P01877	IGHA2_HUMAN	N
triosephosphate isomerase	P60174	TPIS_PANTR	N
actin, aortic smooth muscle	P62736	ACTA_BOVIN	N
salivary proline-rich protein (clone CP7)	P02812	PRB2_HUMAN	Y	y
cysteine-rich secretory protein-3	P54108	CRIS3_HUMAN	Y	y
complement C3	P01024	CO3_HUMAN	Y
α−2-HS-glycoprotein	P02765	FETUA_HUMAN	Y
Ig λ light chain	Q6GMV7	Q6GMV7_HUMAN	Y
mucin 5B	Q9HC84	MUC5B_HUMAN	Y

## Sheet: SF4
Protein name	Protein accession numbers	UniProt	UniProt ID	Signal P	Human ortholog/paralog expressed	Rat ortholog/paralog expressed
Isoform 7 of Inositol 1,4,5-trisphosphate receptor type 1	IPI00117630	P11881	ITPR1_MOUSE	no
Mannosyl-oligosaccharide 1,2-alpha-mannosidase IA	IPI00132493	P45700	MA1A1_MOUSE	no
Keratin intermediate filament 16a	IPI00131209	Q3ZAW8	Q3ZAW8_MOUSE	no
Protein hairless	IPI00123616	Q61645	HAIR_MOUSE	no
nerve growth factor, beta isoform A	IPI00336602	Q6LDU8	Q6LDU8_MOUSE	no
Dcpp2 protein	IPI00420775	Q6PCW3	Q6PCW3_MOUSE	no
Putative uncharacterized protein	IPI00404881	Q8BTJ6	Q8BTJ6_MOUSE	no
titin isoform N2-A	IPI00604969	Q8BUJ6	TTN_MOUSE	no
Olfactory receptor Olfr460	IPI00125039	Q8VF31	Q8VF31_MOUSE	no
Keratin, type II cytoskeletal 5	IPI00139301	Q922U2	K2C5_MOUSE	no
Putative uncharacterized protein (Klkb7-ps)	IPI00112184	Q9D974	Q9D974_MOUSE	no
E3 SUMO-protein ligase RanBP2	IPI00337844	Q9ERU9	RBP2_MOUSE	no
Isoform 2 of Myosin-XVIIIa	IPI00407425	Q9JMH9	MY18A_MOUSE	no
Lysosomal alpha-mannosidase	IPI00381303	O09159	MA2B1_MOUSE		y
Polymeric immunoglobulin receptor	IPI00310059	O70570	PIGR_MOUSE		y
Transcobalamin-2	IPI00136556	O88968	TCO2_MOUSE		y
Alpha-amylase 1	IPI00315893	P00687	AMY1_MOUSE		y
Pancreatic alpha-amylase	IPI00133544	P00688	AMYP_MOUSE		y
Pro-epidermal growth factor	IPI00132121	P01132	EGF_MOUSE		y
Prolactin-inducible protein homolog	IPI00113711	P02816	PIP_MOUSE		y
Serum albumin	IPI00131695	P07724	ALBU_MOUSE		y
Parotid secretory protein	IPI00131763	P07743	BPIA2_MOUSE		y
angiotensinogen	IPI00654069	P11859	ANGT_MOUSE		y
Kallikrein-1	IPI00323869	P15947	KLK1_MOUSE		y
Carbonic anhydrase 6	IPI00114881	P18761	CAH6_MOUSE		y
granulin	IPI00124640	P28798	GRN_MOUSE		y
Deoxyribonuclease-1	IPI00308684	P49183	DNAS1_MOUSE		y
Nucleobindin-2	IPI00309704	P81117	NUCB2_MOUSE		y
Cysteine-rich secretory protein 1	IPI00132195	Q03401	CRIS1_MOUSE		y
proline-rich protein MP5	IPI00378976	Q58E44	PRPMP5_MOUSE		y
lactoperoxidase	IPI00133770	Q5SW46	LPO_MOUSE		y
Long palate, lung and nasal epithelium carcinoma-associated protein 1	IPI00117756	Q61114	BPIB1_MOUSE		y
Submaxillary gland androgen-regulated protein 3A	IPI00127277	Q61900	SMR3A_MOUSE		y
Mucin-19	IPI00464259	Q6PZE0	SMGC_MOUSE		y
Uncharacterized protein C6orf58 homolog	IPI00471102	Q8C6C9	CF058_MOUSE		y
Proline-rich protein BstNI subfamily 1	IPI00378614	Q91X93	PRB1_MOUSE		y
WAP four-disulfide core domain protein 12	IPI00120005	Q9JHY3	WFD12_MOUSE		y
DD72 protein	IPI00124867	Q9JM84	CST10_MOUSE		y
gamma-glutamyl hydrolase precursor	IPI00828662	Q9Z0L8	GGH_MOUSE		y
demilune cell and parotid protein 3	IPI00469417	D35YUM5	DCPP3_MOUSE			y
demilune cell and parotid protein 2	IPI00662097	E9PYC2	DCCP2_MOUSE			y
mucin 10	IPI00116916	E9PYQ4	PROL1_MOUSE			y
Ovostatin homolog	IPI00169490	Q3UU35	OVOS_MOUSE			y
demilune cell and parotid protein	IPI00118977	Q60601	DCPP1_MOUSE			y
Sublingual parotid tongue-1 salivary protein	IPI00154104	Q64097	DCPP1_MOUSE			y
Acidic mammalian chitinase	IPI00346516	Q91XA9	CHIA_MOUSE			y
Chitinase-3-like protein 4	IPI00314910	Q91Z98	CH3L4_MOUSE			y
OBP1f-like	IPI00136222	Q9D3N5	Q9D3N5_MOUSE			y
Kallikrein 1-related peptidase b1	IPI00134580	P00755	K1KB1_MOUSE
Kallikrein 1-related peptidase b3	IPI00134582	P00756	K1KB3_MOUSE
Kallikrein 1-related peptidase-like b4	IPI00316234	P00757	K1KB4_MOUSE
Kallikrein 1-related peptidase b27	IPI00124824	Q9JM71	K1B27_MOUSE
Kallikrein 1-related peptidase b16	IPI00113575	P04071	K1B16_MOUSE
Kallikrein 1-related peptidase b8	IPI00130801	P07628	K1KB8_MOUSE
Kallikrein 1-related peptidase b5	IPI00136033	P15945	K1KB5_MOUSE
Kallikrein 1-related peptidase b11	IPI00136034	P15946	K1B11_MOUSE
Kallikrein 1-related peptidase b22	IPI00136038	P15948	K1B22_MOUSE
Kallikrein 1-related peptidase b9	IPI00136040	P15949	K1KB9_MOUSE
Kallikrein 1-related peptidase b24	IPI00124804	Q61754	K1B24_MOUSE
Kallikrein 1-related peptidase b21	IPI00124822	Q61759	K1B21_MOUSE
Androgen binding protein alpha	IPI00127933	Q63930	ABPA27_MOUSE
androgen binding protein gamma	IPI00170392	Q8JZX1	ABPBG26_MOUSE
Salivary androgen-binding protein beta subunit	IPI00153363	Q8R1E9	ABPBG27_MOUSE
trypsinogen 7	IPI00131674	Q9CPN9	Q9CPN9_MOUSE
Putative uncharacterized protein	IPI00136226	Q9D3N7	Q9D3N7_MOUSE
hypothetical protein LOC381819	IPI00918176	E9PWS6	E9PWS6_MOUSE
16.5 kDa submandibular gland glycoprotein	IPI00113710	P02815	SG16_MOUSE
Major urinary protein 5	IPI00115243	P11591	MUP5_MOUSE
Epidermal growth factor-binding protein type B	IPI00121818	P36368	EGFB2_MOUSE
Extracellular peptidase inhibitor	IPI00126104	P62810	WFD18_MOUSE
Isoform 1 of Vomeromodulin	IPI00349521	Q80XI7	VOME_MOUSE

## Sheet: SF5
Name	IPI	UniProt ID	UniProt	SignalP?	Human ortholog/paralog expressed	Mouse ortholog/paralog expressed
titin	IPI00959327	TTN_RAT	Q9JHQ1	no		y
Isoform 5-HT4L of 5-hydroxytryptamine receptor 4	IPI00208196	5HT4R_RAT	Q62758	no
Protein	IPI00565415	F1M219_RAT	F1M219	no
hemoglobin alpha 2 chain	IPI00205036	HBA_RAT	P01946	no	y
IQ motif containing GTPase activating protein 1	IPI00365769	IQGAP1_RAT	G3V7Q7	no
Spermatogenesis-associated protein 19, mitochondrial	IPI00200836	SPT19_RAT	Q920Q3	no
Putative uncharacterized protein Syne1	IPI00958822	SYNE1_RAT	D3ZEA8	no
Serum albumin	IPI00191737	ALBU_RAT	P02770		y
Alpha-amylase	IPI00198466	AMY1A_RAT	Q99N59		y
Pancreatic alpha-amylase	IPI00211904	AMYP_RAT	P00689		y
Parotid secretory protein	IPI00209118	BPIA2_RAT	Q63471		y
Long palate, lung and nasal epithelium carcinoma-associated protein 1	IPI00780659	BPIB1_RAT	A0JPN3		y
Neonatal submandibular gland proacinar cell protein	IPI00210084	BPIF2AF_RAT	Q63550		y
carbonic anhydrase VI	IPI00569317	CAR6_RAT	F1LQ08		y
Cysteine-rich secretory protein 1	IPI00193789	CRIS1_RAT	P12020		y
Putative uncharacterized protein Cst10	IPI00870333	CST5_RAT	D4AAU9		y
Deoxyribonuclease-1	IPI00230876	DNAS1_RAT	P21704		y
kallikrein 1-related peptidase b3	IPI00231193	KLK1_RAT	P00758		y
Putative uncharacterized protein Lpo	IPI00370706	LPO_RAT	D4A400		y
Nucleobindin-2	IPI00200070	NUCB2_RAT	Q9JI85		y
Polymeric immunoglobulin receptor	IPI00205255	PIGR_RAT	P15083		y
Prolactin-inducible protein homolog	IPI00198494	PIP_RAT	O70417		y
21 kDa protein	IPI00393647	PRP15_RAT	E9PU38		y
Salivary proline-rich protein	IPI00211506	PRP15_RAT	Q04105		y
Acidic proline-rich protein PRP25 (Fragment)	IPI00187925	PRP2_RAT	P10164		y
Salivary proline-rich protein	IPI00211674	PRP2_RAT	Q05154		y
Acidic proline-rich protein PRP33	IPI00195971	PRP3_RAT	P04474		y
Proline-rich proteoglycan 2	IPI00187926	PRPG2_RAT	P10165		y
Ribonuclease pancreatic beta-type	IPI00211902	RNS1B_RAT	P00684		y
SMR1 protein	IPI00325582	SMR1_RAT	P13432		y
SMR1-alpha1	IPI00210086	SMR1A1_RAT	Q63552		y
PR-Vbeta1	IPI00211778	SMR3A_RAT	Q64371		y
cDNA sequence BC048546	IPI00358444	A2M_RAT	D3ZS19			y
Acidic mammalian chitinase	IPI00421295	CHIA_RAT	Q6RY07			y
Putative uncharacterized protein RGD1306750	IPI00869706	D3Z9M3_RAT	D3Z9M3			y
Common salivary protein 1	IPI00204777	LOC171161	Q63015			y
RCG36470	IPI00369047	OBP1F_RAT	Q9QYU9			y
Apomucin	IPI00206980	PROL1_RAT	Q63549			y
Submandibular gland protein C	IPI00454347	SMGC_RAT	Q6JHY3			y
Ba1-667	IPI00196656	TRFE_RAT	Q7TP24			y
Anionic trypsin-1	IPI00212767	TRY1_RAT	P00762			y
Von Ebner gland protein 1	IPI00197508	VEGP1_RAT	P20289			y
Alpha-2u globulin	IPI00206823	A2M_RAT	Q63213
Contiguous repeat polypeptide	IPI00211295	CRP_RAT	Q63134
Putative uncharacterized protein Grpcb	IPI00373414	GRCPB_RAT	D4A0S3
